# Supplementary material
Source: PubMed Central journal article supplement (PMC1593160)
Supplement: mbc_E05-11-1061_1.pdf [file mbc_E05-11-1061_1.pdf]

**Table S1. Comparison of the Nup107-160 complex in mitotic and interphase *Xenopus* extracts.**

|               | INTERPHASE  |            | IgG | MITOTIC     |            |
|---------------|-------------|------------|-----|-------------|------------|
|               | anti-Nup133 | anti-Nup43 |     | anti-Nup133 | anti-Nup43 |
| <b>Nup160</b> | +           | +          | -   | +           | +          |
| <b>Nup133</b> | +           | +          | -   | +           | +          |
| <b>Nup107</b> | +           | +          | -   | +           | +          |
| <b>Nup96</b>  | +           | +          | -   | +           | +          |
| <b>Nup85</b>  | +           | +          | -   | +           | +          |
| <b>Nup43</b>  | +           | +          | -   | +           | +          |
| <b>Nup37</b>  | +           | +          | -   | +           | +          |
| <b>Sec13</b>  | +           | +          | -   | +           | +          |
| <b>Seh1</b>   | +           | +          | -   | +           | +          |

The Nup107-160 complex was immunoprecipitated from unfractionated mitotic and interphase *Xenopus* egg extracts with either affinity purified anti-hNup133 or anti-xNup43 antisera. The immunoprecipitate was analyzed by mass spectroscopy to determine whether the Nup107-160 complex proteins were present in mitotic extracts, as in interphase extracts. All nine members of the Nup107-160 complex appeared in anti-Nup133 and anti-Nup43 immunoprecipitates from both mitotic and interphase. None of the nine were observed in parallel immunoprecipitations performed with control IgG antisera. (The mass spectroscopy results for Nup160, Nup133, Nup85, Nup43, and Nup37 in interphase and mitotic extracts were also confirmed by immunoblotting).
