# Supplementary material
Source: PubMed Central journal article supplement (PMC1593160)
Supplement: mbc_E05-11-1061_3.pdf [file mbc_E05-11-1061_3.pdf]

**Table S3. Microtubule density of cycled spindles formed in egg extracts treated with antibodies against Nup107-160 complex members.**

| <b>Antibodies Added</b> | <b>n</b> | <b>Fluorescence Intensity<br/>(mean <math>\pm</math> SD)</b> | <b>Ratio to control</b> |
|-------------------------|----------|--------------------------------------------------------------|-------------------------|
| <b>Rabbit IgG</b>       | 16       | 155.5 $\pm$ 29.5                                             | 1                       |
| <b>Anti-Nup133</b>      | 16       | 76.8 $\pm$ 20.1                                              | 0.50                    |
| <b>Anti-Nup43</b>       | 15       | 79.1 $\pm$ 21.8                                              | 0.51                    |

To quantitate the relative density of microtubules in the resultant spindles, images were acquired using a 63x objective, and analyzed using Imaris imaging software. A 100 x 100 pixel region was chosen roughly half way between the chromosomes and spindle poles. The fluorescence within this region was integrated. Background was determined by measuring a corresponding 100 x 100 pixel region in an adjoining area of the same field lacking microtubules or chromatin. The background was subtracted to provide the final measurement of fluorescence intensity.
